# Supplementary material for: Nesfatin-1 and nesfatin-1-like peptide suppress growth hormone synthesis via the AC/PKA/CREB pathway in mammalian somatotrophs
Source: PubMed Central journal article supplement (PMC7541516; doi:10.1038/s41598-020-73840-4), 2020-10-07

# **Nesfatin-1 and nesfatin-1-like peptide suppress growth hormone synthesis via the AC/PKA/CREB pathway in mammalian somatotrophs**

Emilio J. Vélez, Suraj Unniappan\*

Laboratory of Integrative Neuroendocrinology, Department of Veterinary Biomedical Sciences, Western College of Veterinary Medicine, University of Saskatchewan, Saskatoon, Canada

## **Supplementary Material**

- **Fig. S1.** mRNA levels of *nucb1* and *nucb2*
- **Fig. S2.** (a) Colocalization of NUCB1 and NUCB2 with GH and (b) effects of nesfatin-1 (NESF) incubation on *gh* gene expression in RC-4B/C cells.
- **Fig. S3.** No-primary antibody-negative controls
- **Table S1.** Primer sequences.
- **Gels:** Agarose gels used in **Figure 1a**.
- **Blots:** Western blot gels used in **Figures 1, 4 and 6.**

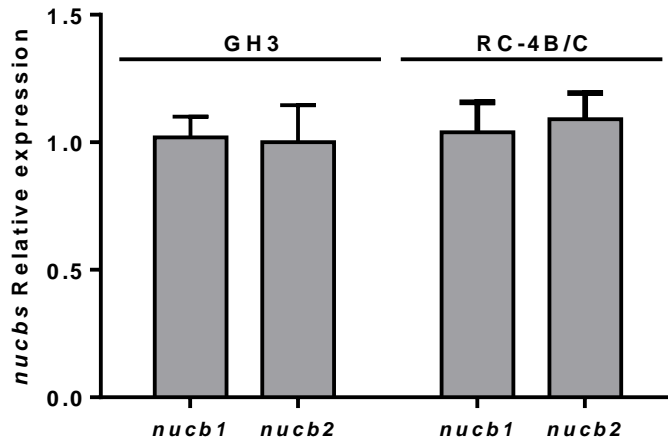

**Fig. S1. Mammalian somatotrophs express both NUCB1 and NUCB2.** Representative mRNA levels of *nucb1* and *nucb2* in both GH3 and RC-4B/C rat somatotroph cells. Data are shown as mean  $\pm$  SEM (n = 3 wells) relative to the reference genes  *$\beta$ -actin* and *rpl13*.

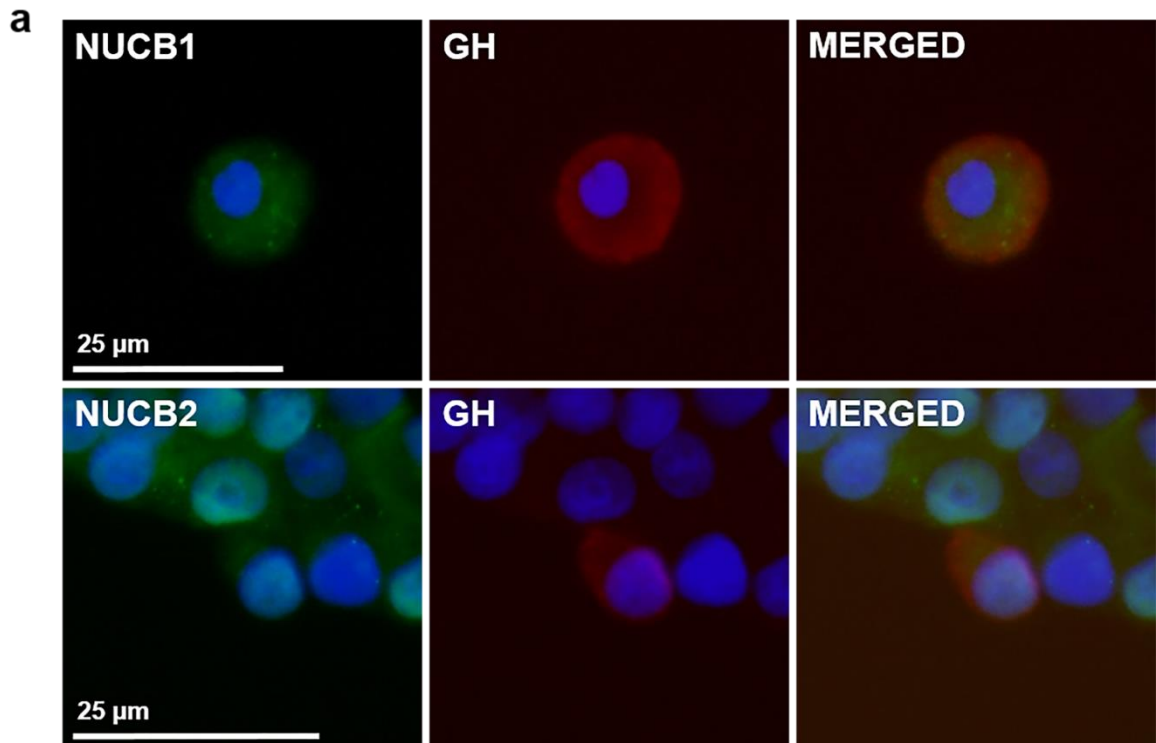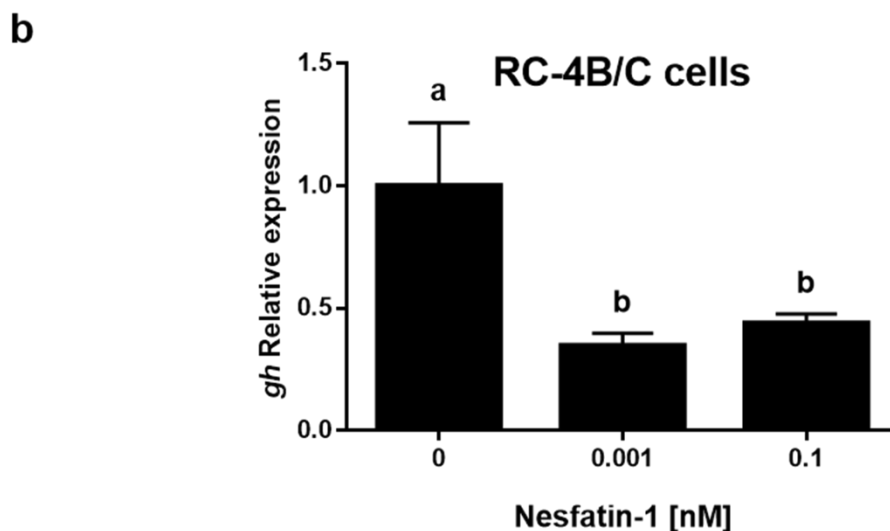

**Fig. S2. (a) Colocalization of NUCB1 and NUCB2 with GH in RC-4-B/C cells.** Representative images of immunofluorescence detection of NUCB1 (green), NUCB2 (green) and GH (red) in RC-4B/C cells. Cells were counterstained with DAPI (blue) and the images were acquired at 40X magnification. **(b) Effects of nesfatin-1 (NESF) incubation on *gh* gene expression in RC-4B/C cells.** Gene expression of *gh* after 1 h incubation with NESF in RC-4B/C cells. Data are shown as mean  $\pm$  SEM (n = 12) relative to the reference genes  $\beta$ -actin and *rpl13*. Different letters indicate significant differences ( $p < 0.05$ ) between the different concentrations detected by one-way ANOVA test followed by Tukey's multiple comparison test.

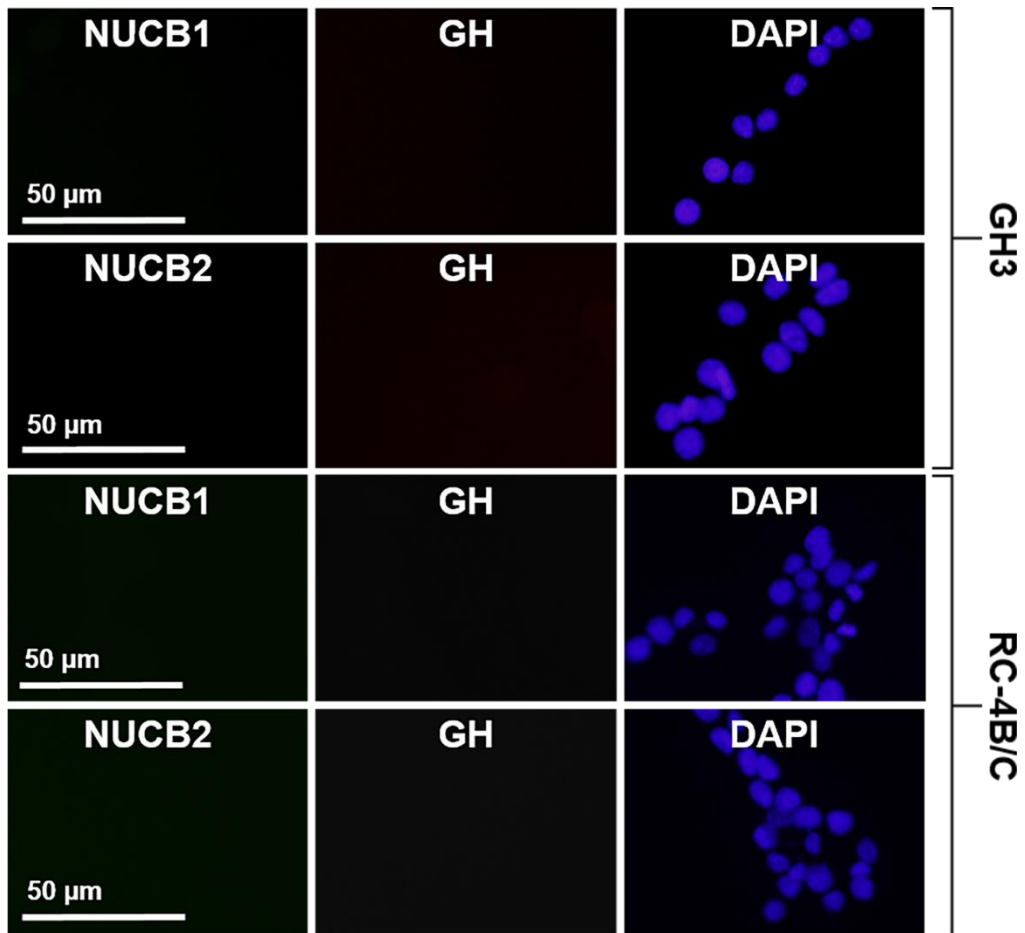

**Fig. S3. No-primary antibody-negative controls of immunofluorescence for NUCB1, NUCB2 and GH in GH3 and RC-4B/C cells.** Cells were counterstained with DAPI (blue) and the images were acquired at 40X magnification. No immunoreactivity was observed, confirming the specificity of the antibodies used.

| Gene           | Primer sequences (5'–3')                             | T <sub>m</sub> °C | GenBank accession no. |
|----------------|------------------------------------------------------|-------------------|-----------------------|
| <i>Gapdh</i>   | F:CTACCCACGGCAAGTTCAAC<br>R:CCAGTAGACTCCACGACATAC    | 60                | <u>NM_01708</u>       |
| <i>β-actin</i> | F:CCCATCTATGAGGGTTACGC<br>R:TTTAATGTCACGCACGATTTC    | 60                | <u>NM_031144.3</u>    |
| <i>Rpl13</i>   | F:GGATCCCTCCACCCTATGACA<br>R:CTGGTACTTCCACCCGACCTC   | 60                | <u>NM_173340</u>      |
| <i>Nucb1</i>   | F:TGCCAACGCTGAGGACATTA<br>R:GTCCACCTGCAAGTTAGGCT     | 60                | <u>NM_053463.1</u>    |
| <i>Nucb2</i>   | F:CCAGACACGGGACTTTATTATG<br>R:CCGCTCCTTATCTCCTCTATGT | 60                | <u>NM_021663.2</u>    |
| <i>Gh</i>      | F:TGGGCAGATCCTCAAGCAAA<br>R:ACACCAGTGTGTGCCTAGAAA    | 60                | <u>BC166872.1</u>     |
| <i>Pit-1</i>   | F:GGAGAGCACAGCAAACCTTC<br>R:CGTTTTTCTCTCTGCCTTCG     | 60                | <u>L01507.1</u>       |

**Table S1. Forward (F) and reverse (R) primer sequences used for the qPCR analysis.** qPCR conditions consisted of an initial activation step at 95 °C for 2 min, 40 cycles of 5 s. at 95 °C, 25 s. at 60 °C followed by a melting curve analysis through a temperature gradient of 65 to 95 °C with a 0.5 °C increase every 5 s.

**Gels. Full-length agarose gels used to prepare Figure 1a.**

**Gene expression of *nucb1*, *nucb2* and  $\beta$ -actin in (a) GH3, and (b) RC-4B/C cells.**

Each PCR product was separated by 1.5% agarose gel electrophoresis and visualized using RED Safe Nucleic Acid Staining Solution (cat no. 21141, FROGGABIO, Canada) in a ChemiDoc MP Imaging System (BIO-RAD, Canada). **NTC**: No Template Control. **RTC**: No Reverse Transcriptase Control. **PCRC**: PCR Control (No Template Control in the PCR).

Bands shown in **Fig. 1a** are boxed, and the molecular markers presented.

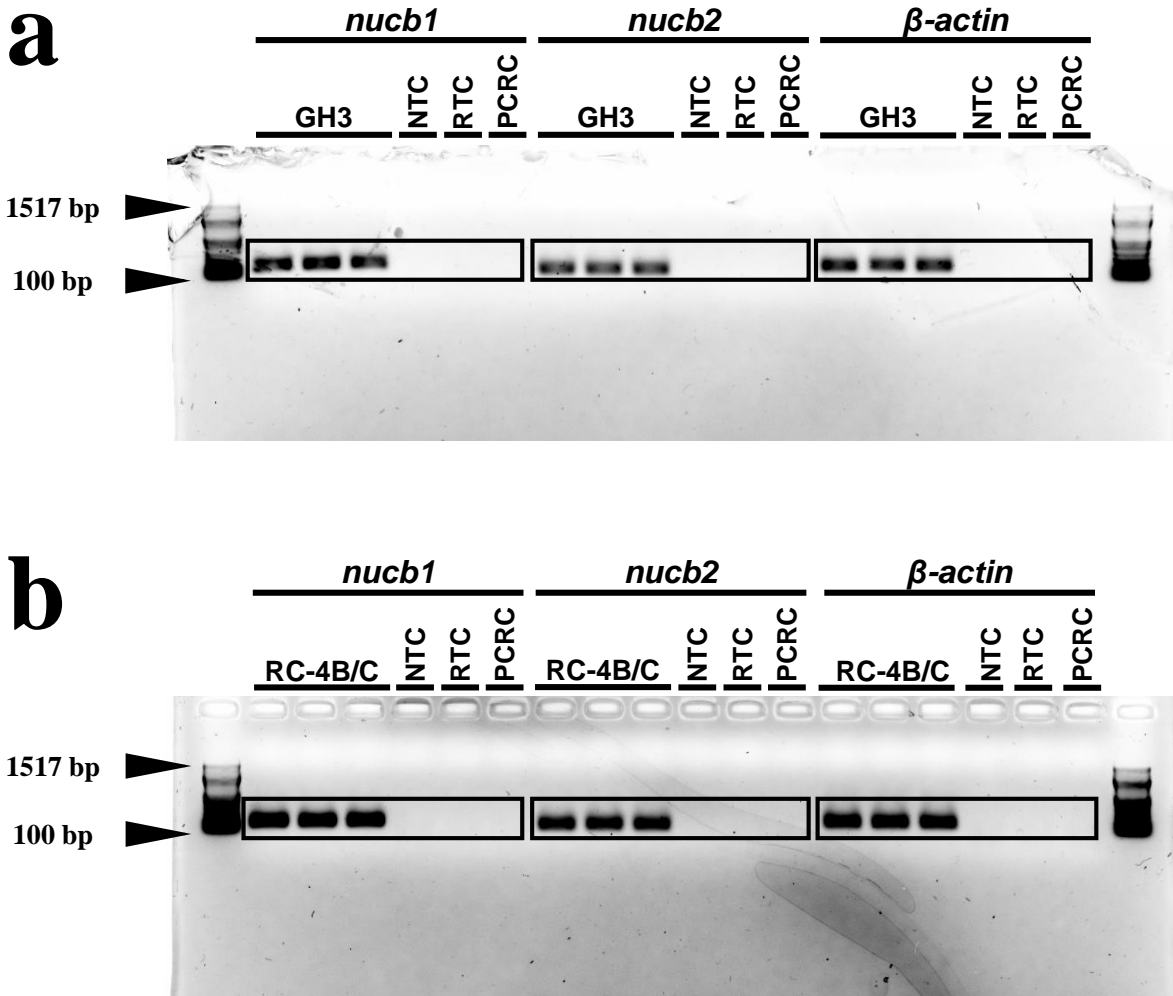

**Blots. Full-length Western blot gels** used to prepare the figures. Representative immunoreactive bands of the different experiments:

**(a) NUCB1, NUCB2 and  $\beta$ -actin immunoreactivity in GH3 cells.**  
Bands shown in **Fig. 1b** are boxed, and the molecular markers presented.

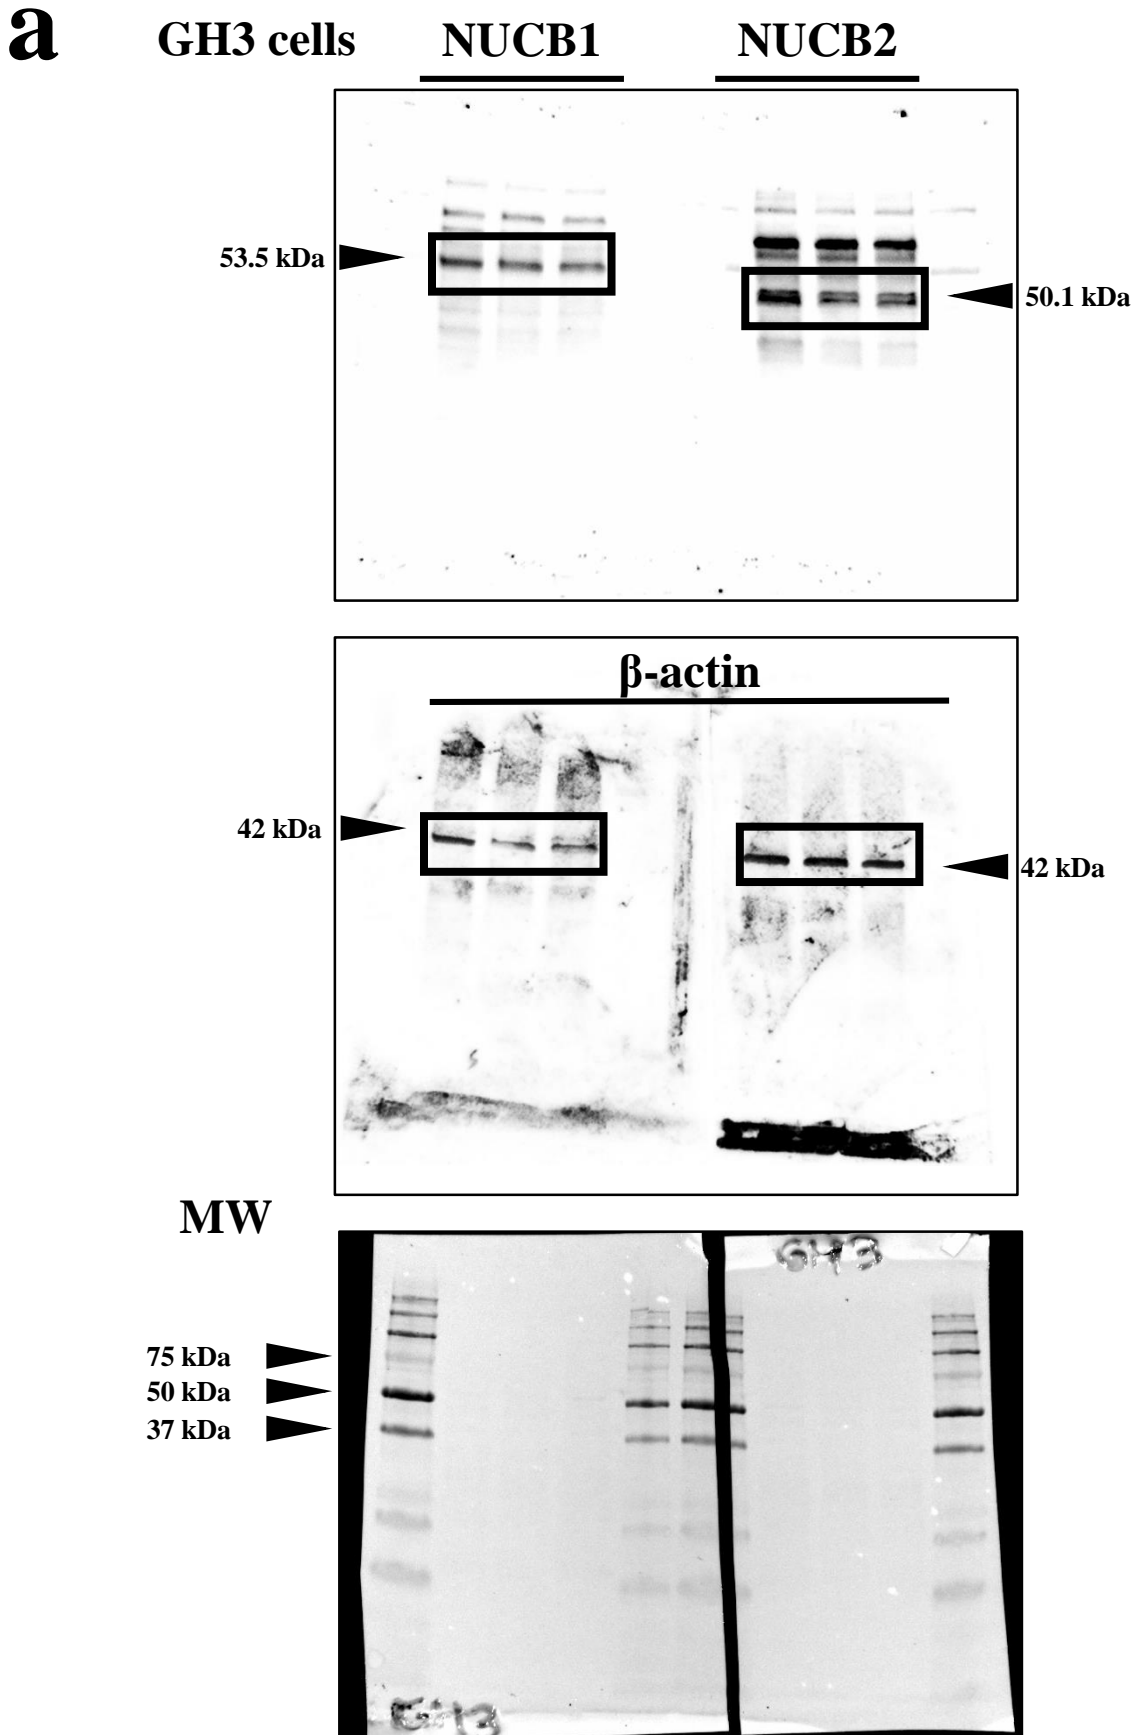

**Blots. Full-length Western blot gels** used to prepare the figures. Representative immunoreactive bands of the different experiments:

**(b) NUCB1, NUCB2 and  $\beta$ -actin immunoreactivity in RC-4B/C cells.**  
Bands shown in **Fig. 1b** are boxed, and the molecular markers presented.

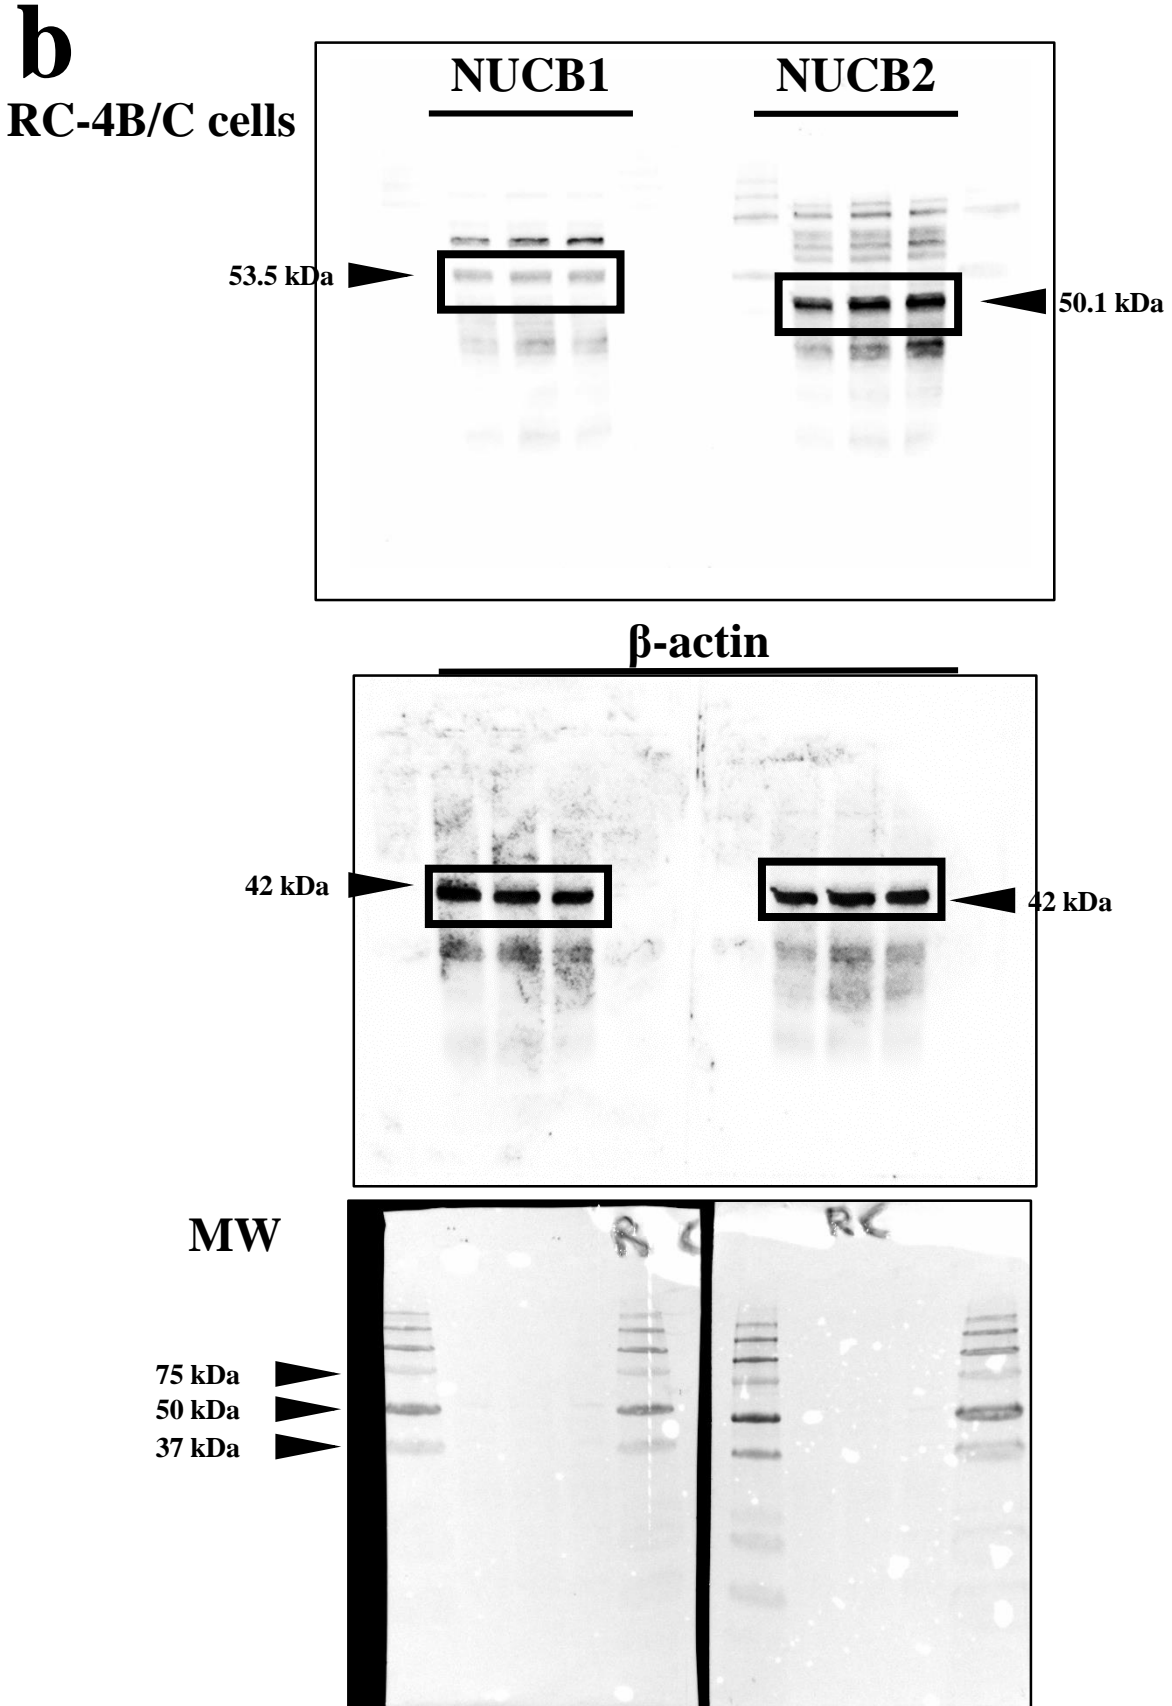



**Blots. Full-length Western blot gels used to prepare the figures. Representative immunoreactive bands of the different experiments:**

**(c) GH and  $\beta$ -actin immunoreactivity in GH3 cells after 1h incubation with nesfatin-1 (NESF).**

Bands shown in **Fig. 4a** are boxed, and the molecular markers presented.

**C**

## NESF 1h

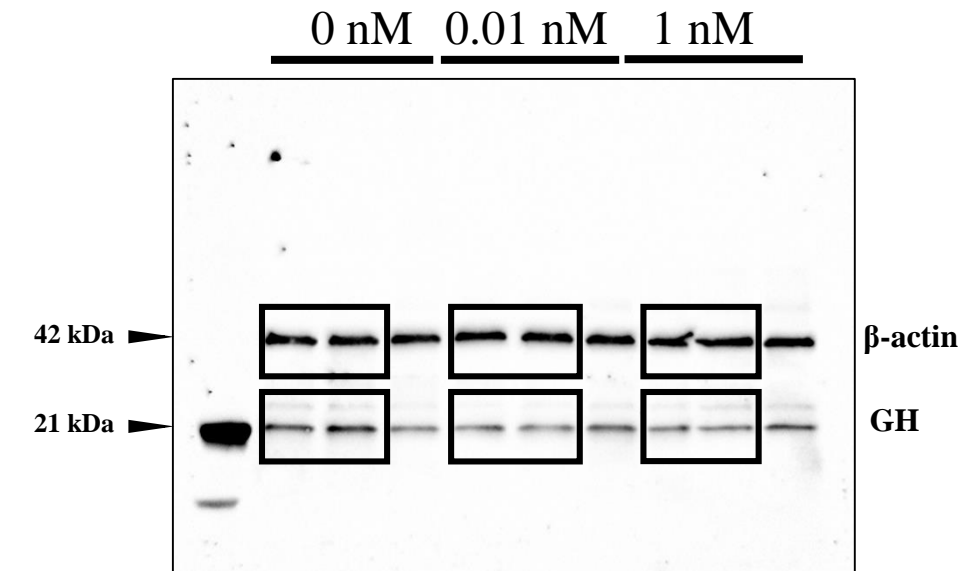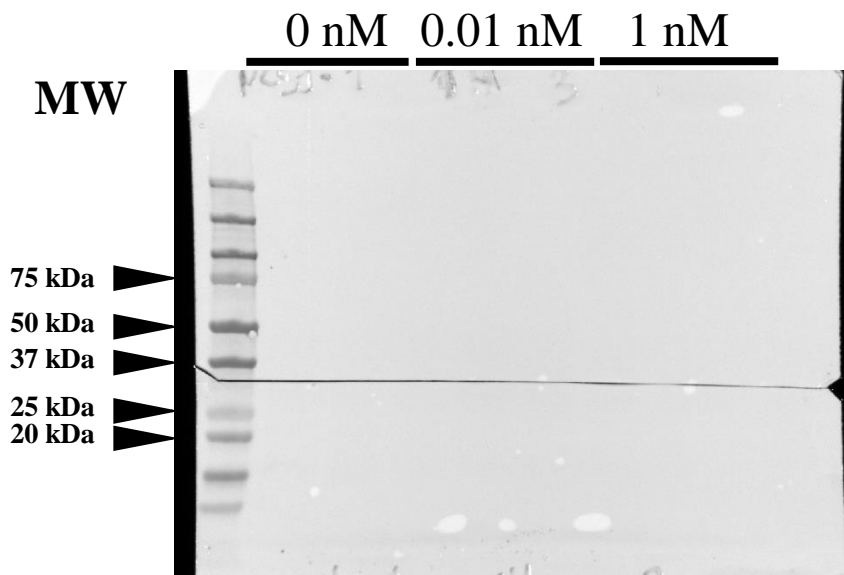

**Blots. Full-length Western blot gels used to prepare the figures. Representative immunoreactive bands of the different experiments:**

**(d) GH and  $\beta$ -actin immunoreactivity in GH3 cells after 6h incubation with nesfatin-1 (NESF).**

Bands shown in **Fig. 4b** are boxed, and the molecular markers presented.

**d**

## NESF 6h

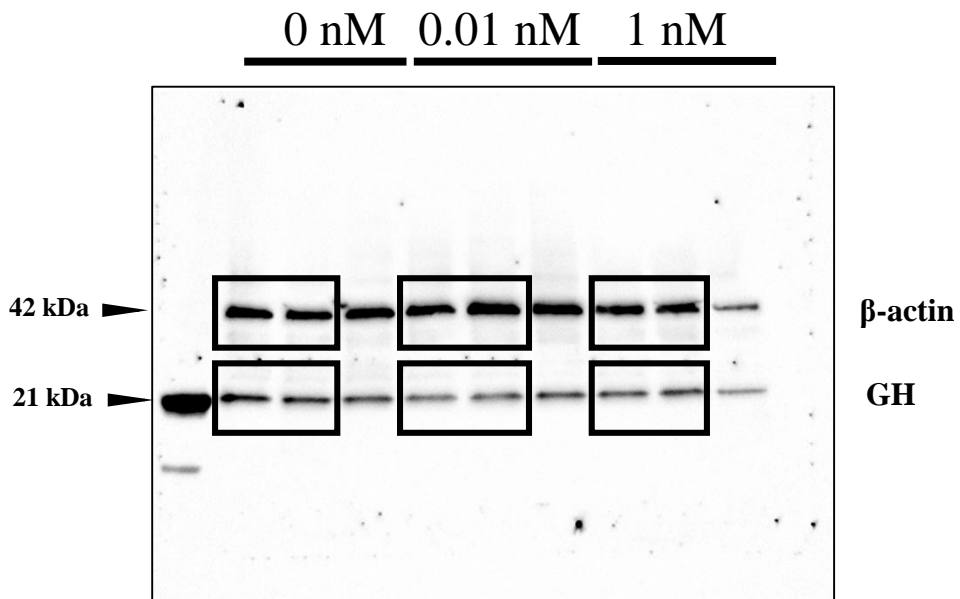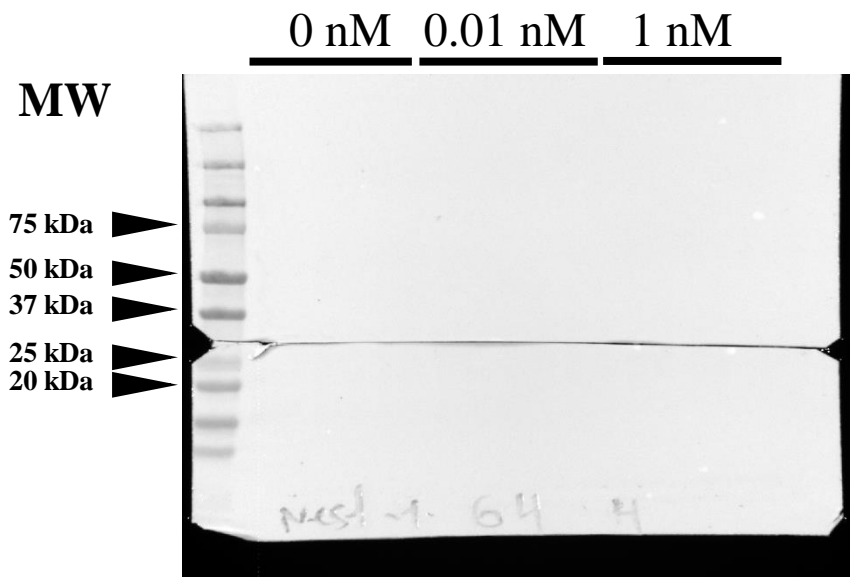

**Blots. Full-length Western blot gels used to prepare the figures. Representative immunoreactive bands of the different experiments:**

**(e) GH and  $\beta$ -actin immunoreactivity in GH3 cells after 1h incubation with NLP.**

Bands shown in **Fig. 4c** are boxed, and the molecular markers presented.

**e**

## NLP 1h

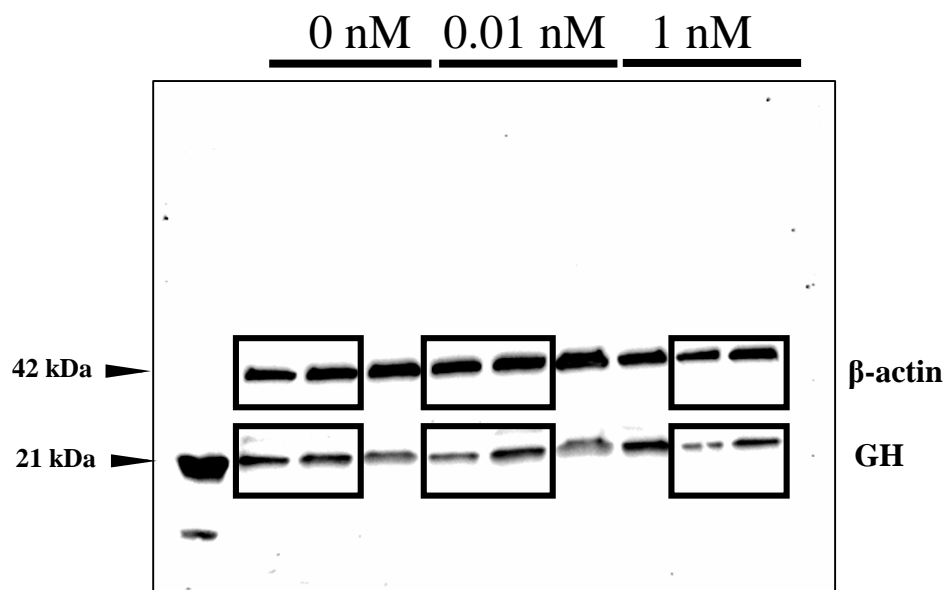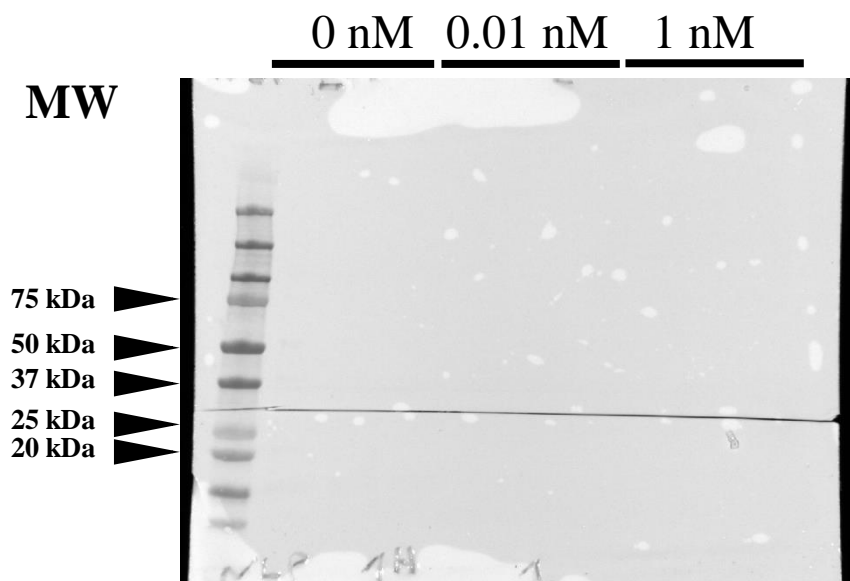

**Blots. Full-length Western blot gels** used to prepare the figures. Representative immunoreactive bands of the different experiments:

**(f) GH and  $\beta$ -actin immunoreactivity in GH3 cells after 6h incubation with NLP.**

Bands shown in **Fig. 4d** are boxed, and the molecular markers presented.

**f**

## NLP 6h

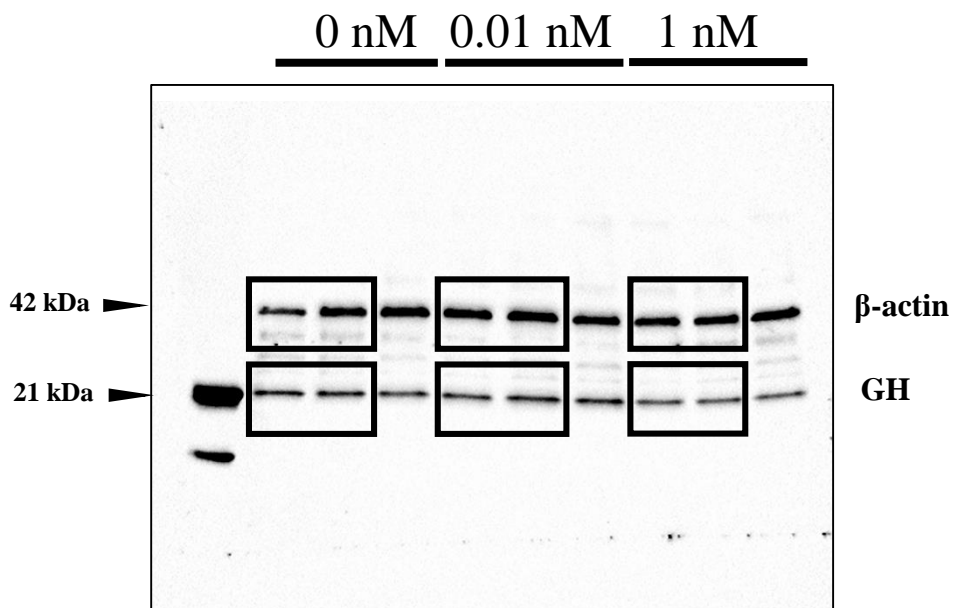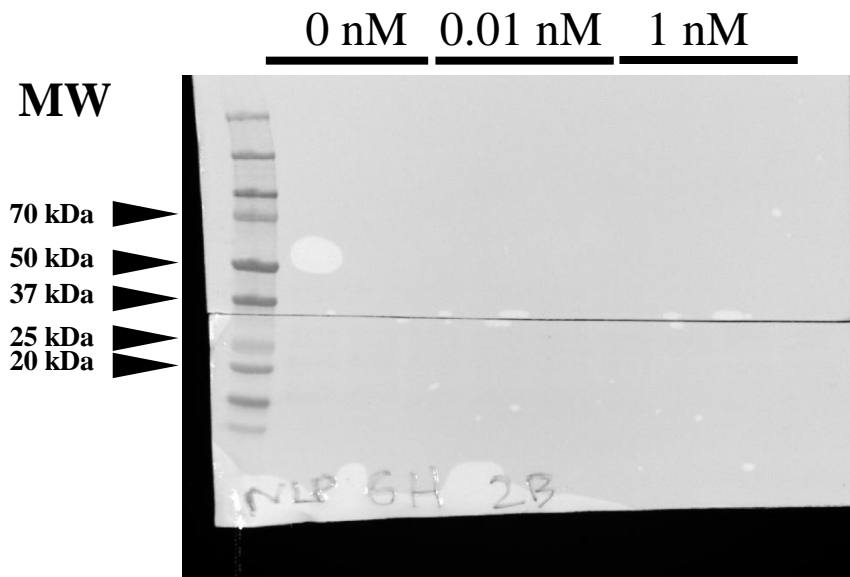

**Blots. Full-length Western blot gels used to prepare the figures. Representative immunoreactive bands of the different experiments:**

**(g) P-CREB, T-CREB and  $\beta$ -actin immunoreactivity in the experiment with forskolin. Bands shown in Fig. 6a are boxed, and the molecular markers presented.**

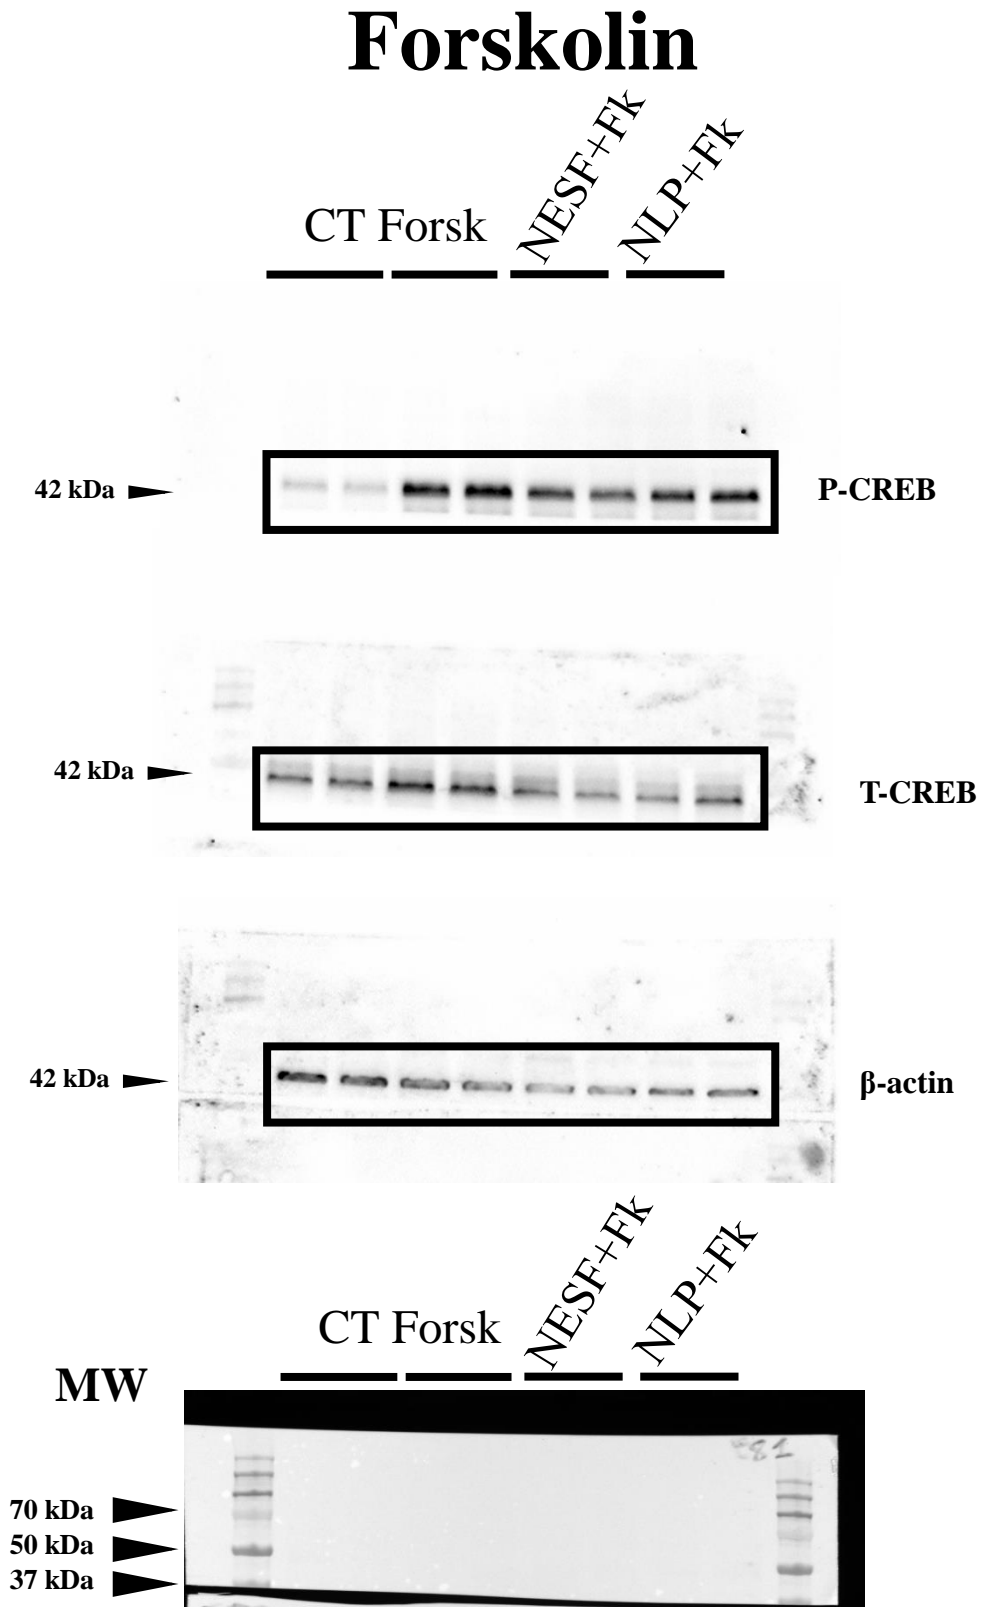

**Blots. Full-length Western blot gels used to prepare the figures. Representative immunoreactive bands of the different experiments:**

**(h) P-CREB, T-CREB and  $\beta$ -actin immunoreactivity in the experiment with CPT. Bands shown in Fig. 6b are boxed, and the molecular markers presented.**

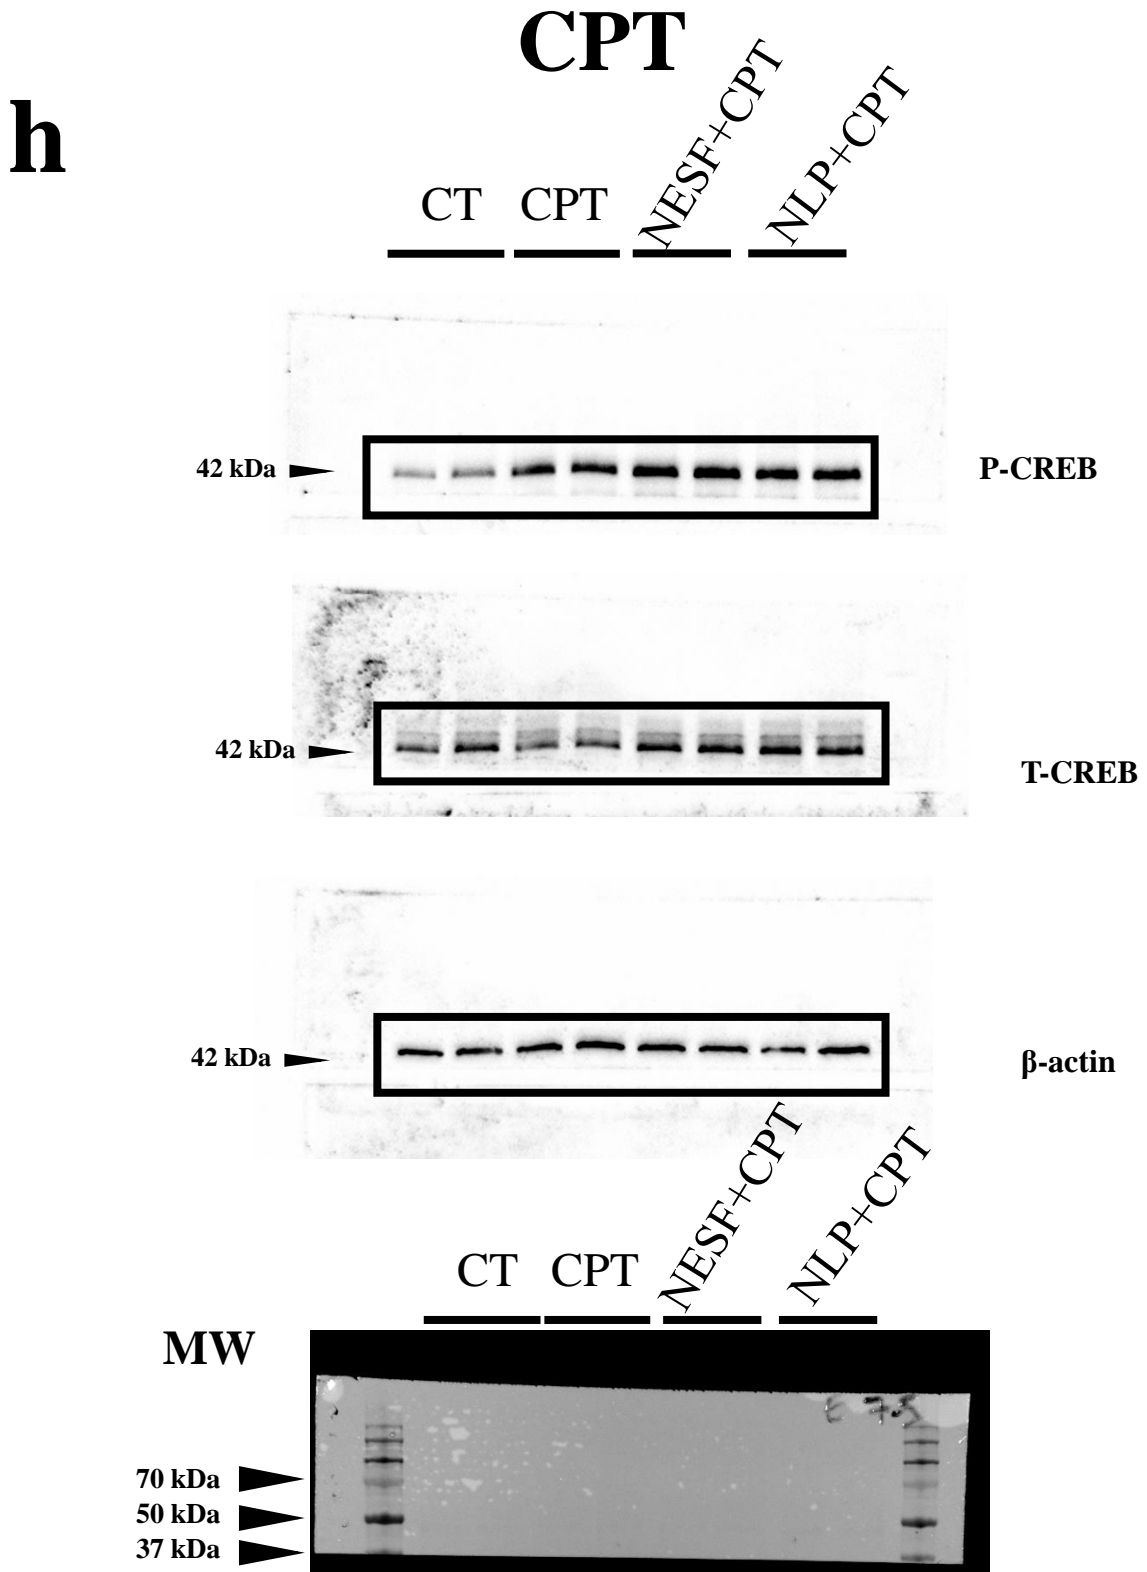

**Blots. Full-length Western blot gels used to prepare the figures. Representative immunoreactive bands of the different experiments:**

**(i) P-CREB, T-CREB and  $\beta$ -actin immunoreactivity in the experiment with GRL. Bands shown in Fig. 6c are boxed, and the molecular markers presented.**

**i**

# GRL

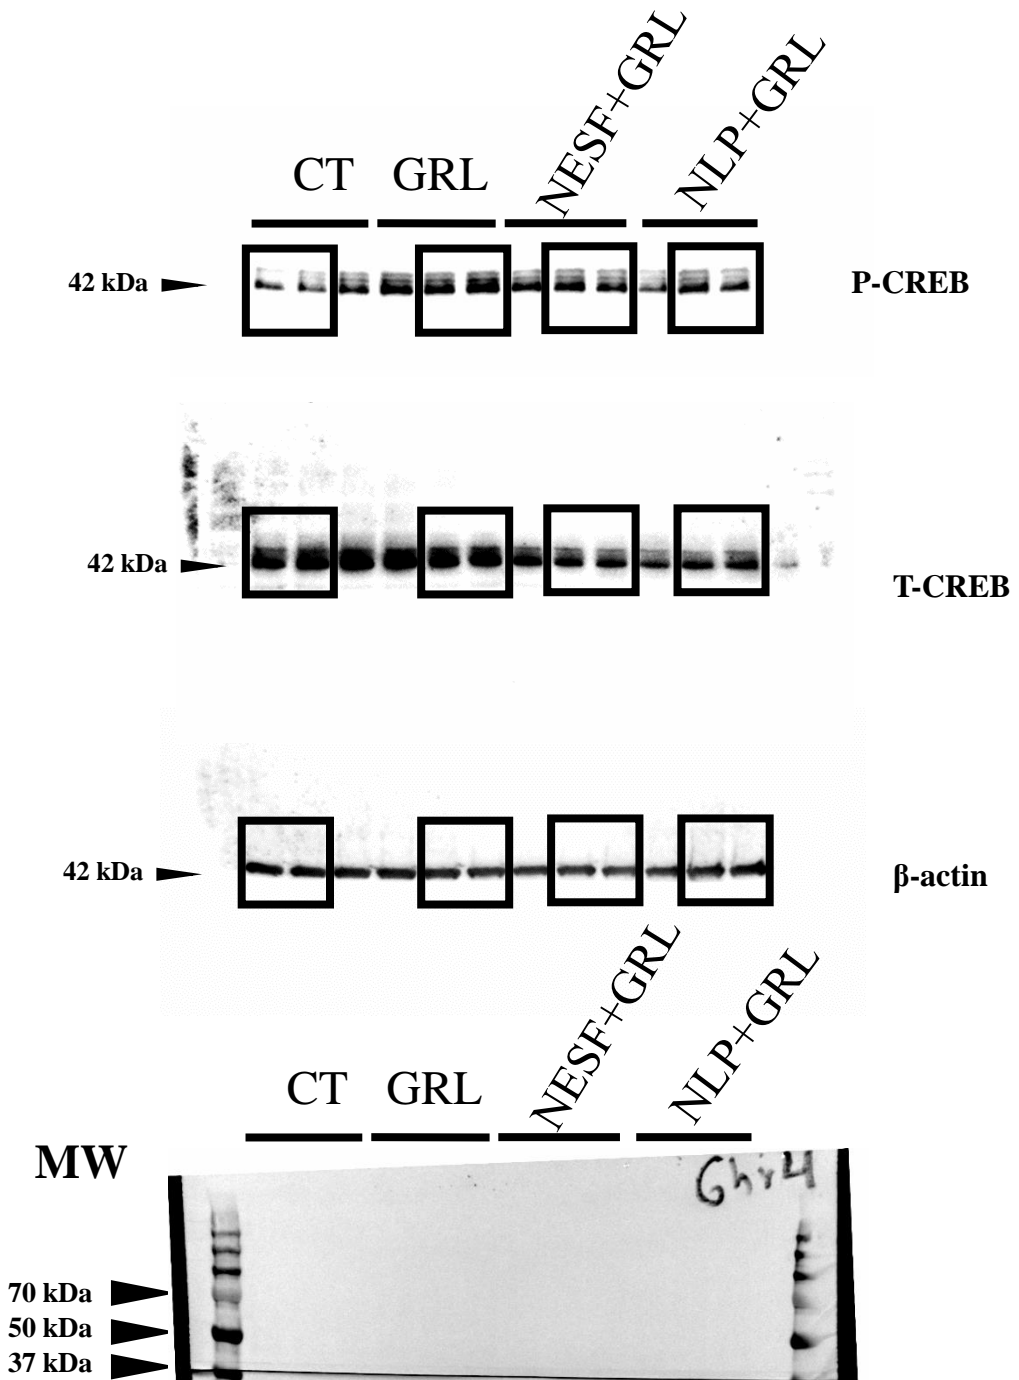

Supplement: 41598_2020_73840_MOESM1_ESM.pdf [file 41598_2020_73840_MOESM1_ESM.pdf]
